# Supplementary material for: Mentoring Nurses in Political Skill to Navigate Organizational Politics
Source: Hindawi journal article supplement (doi:10.1155/2016/3975634), 2016-01-01
Supplement: f1 [file 3975634.f1.pdf]

**Digital Supplemental:** Shared Similarity in the Mentor-Protégé Relationship

*Spearman Correlations for the Nine Mentor/ Protégé Similarity Ratings with the Total Mentoring based on a 5-point metric: 1 = Strongly Disagree to 5 = Strongly Agree.*

*Score (n = 74)*

---

| Mentoring Similarity                 | Mentoring Score |
|--------------------------------------|-----------------|
| Intellectual /Innovative thinking    | .38 ****        |
| Personality                          | .46 ****        |
| Ambition                             | .38 ****        |
| Approach to work or assignments      | .58 ****        |
| Communication Style                  | .59 ****        |
| Social Capital                       | .35 ***         |
| Problem solving skills               | .59 ****        |
| Values about life in general         | .37 ****        |
| Values of work-personal life balance | .40 ****        |

---

. \*\*\*  $p < .005$ . \*\*\*\*  $p < .001$ .
